# Supplementary material
Source: HighWire-hosted journal article supplement (https://srh.bmj.com/content/50/2/107)
Supplement: inline-supplementary-material-1 [file inline-supplementary-material-1.pdf]

## Interview guide

1. What is your view on talking about contraception during pregnancy?
  - Optimal time-point?
  - Room for conversation?
    - a. Was there room to talk about what was important to you?
    - b. How did you perceive health care providers attitudes concerning your preferences for contraception?
  - How did you perceive the information given?
  - How did you perceive the planning for contraceptive use?
2. What is your view on choosing contraceptive method/deciding about contraception in connection with caesarean section?
  - What are your thoughts on timing of any such discussion?
  - How do you perceive being active in decision-making?
3. Reason(s) to choose or not to choose a contraceptive method?
4. What is your view on being offered IUD placement during caesarean section?
  - How did you perceive the information given?
  - What are your thoughts on timing of any such discussion?
  - How do you perceive being active in decision-making?  
(for women who had an IUD placed during caesarean section)
5. For women who had an IUD placed during caesarean section: about 6 weeks have passed since the caesarean section- how is the IUD-method working for you?
6. When looking back – what is your view on:
  - The dialogue about contraception
  - The follow-up after IUD placement?
  - The room for follow-up?
  - Any aspects for possible improvements?
7. Anything that you would like to add to what we have not been talking about?

Supplementary questions:

Can you please tell me more about....

Can you explain...
